# Supplementary material for: Electromechanics of the liquid water vapour interface
Source: Royal Society of Chemistry journal article supplement (doi:10.1039/c9cp06901a), 2020-01-01
Supplement: c9cp06901a1.pdf [file c9cp06901a1.pdf]

# Supporting Information:

## Electromechanics of the liquid water vapour interface

Chao Zhang<sup>†</sup> and Michiel Sprik<sup>\*,‡</sup>

*<sup>†</sup>Department of Chemistry-Ångström Laboratory, Uppsala University, Lägerhyddsvägen 1,  
BOX 538, 75121 Uppsala, Sweden*

*<sup>‡</sup>Department of Chemistry, University of Cambridge, Lensfield Rd, Cambridge CB2 1EW,  
United Kingdom*

E-mail: ms284@cam.ac.uk

## The choice of the dividing surface between interface and bulk regions

In the Main Text, the dividing surface is chosen as 0.9 nm from the onset of  $\gamma_T(z)$  profile which includes the topmost three layers of water molecules at the water vapour interface.

Here, we show how the choice of the dividing surface affects the outcome of the response of  $\gamma_T$  with respect to the  $D$  field.

In Fig. S1, the dividing surface is chosen as 0.6 nm instead. The main feature as shown in Fig. 3 in the Main Text, a concave and asymmetric parabola, remains. However, one needs to notice that the  $\gamma_T$  at  $D = 0$  is far below the macroscopic surface tension which is 610 bar\*nm. This means the choice of the dividing surface as 0.6 nm falls short of including all interfacial contributions.

In Fig. S2, the dividing surface is chosen as 1.2 nm. The shape of a concave and asymmetric parabola starts to deteriorate which indicates the mixing of interfacial and bulk regions. In contrast to that in the interfacial region, the bulk response is a convex and symmetric parabola, as shown in Fig. 4 in the Main Text.

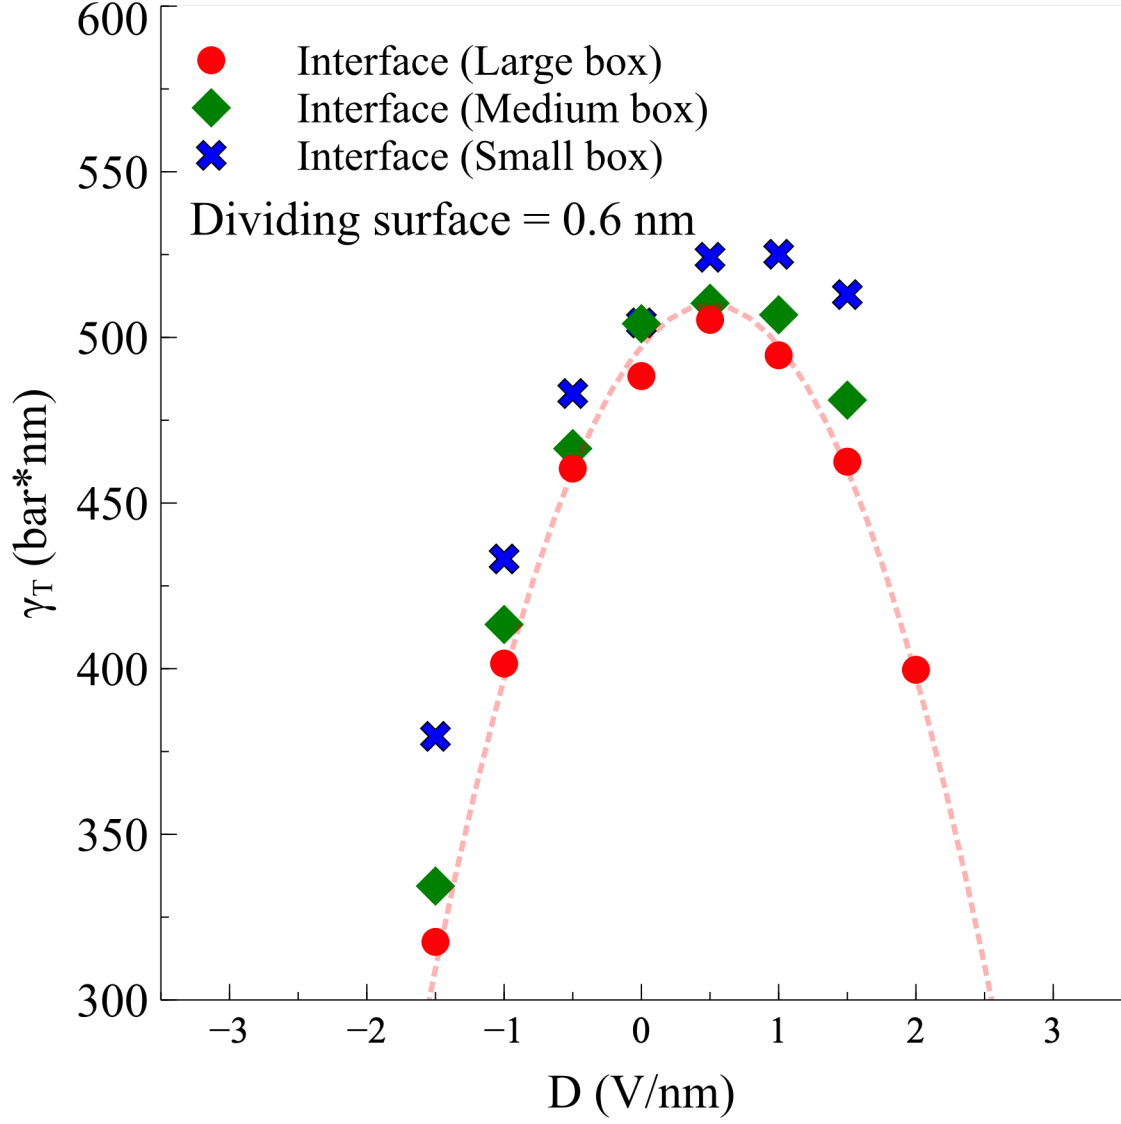

Figure S1: Field-dependent tangential component  $\gamma_T$  of the surface tension of the liquid water vapour interface.  $L_z=5.55$  nm, 8.33 nm and 11.11 nm are the values for the length in the direction normal to the surface for a small, medium and large MD box respectively. A dividing surface is chosen as 0.6 nm.

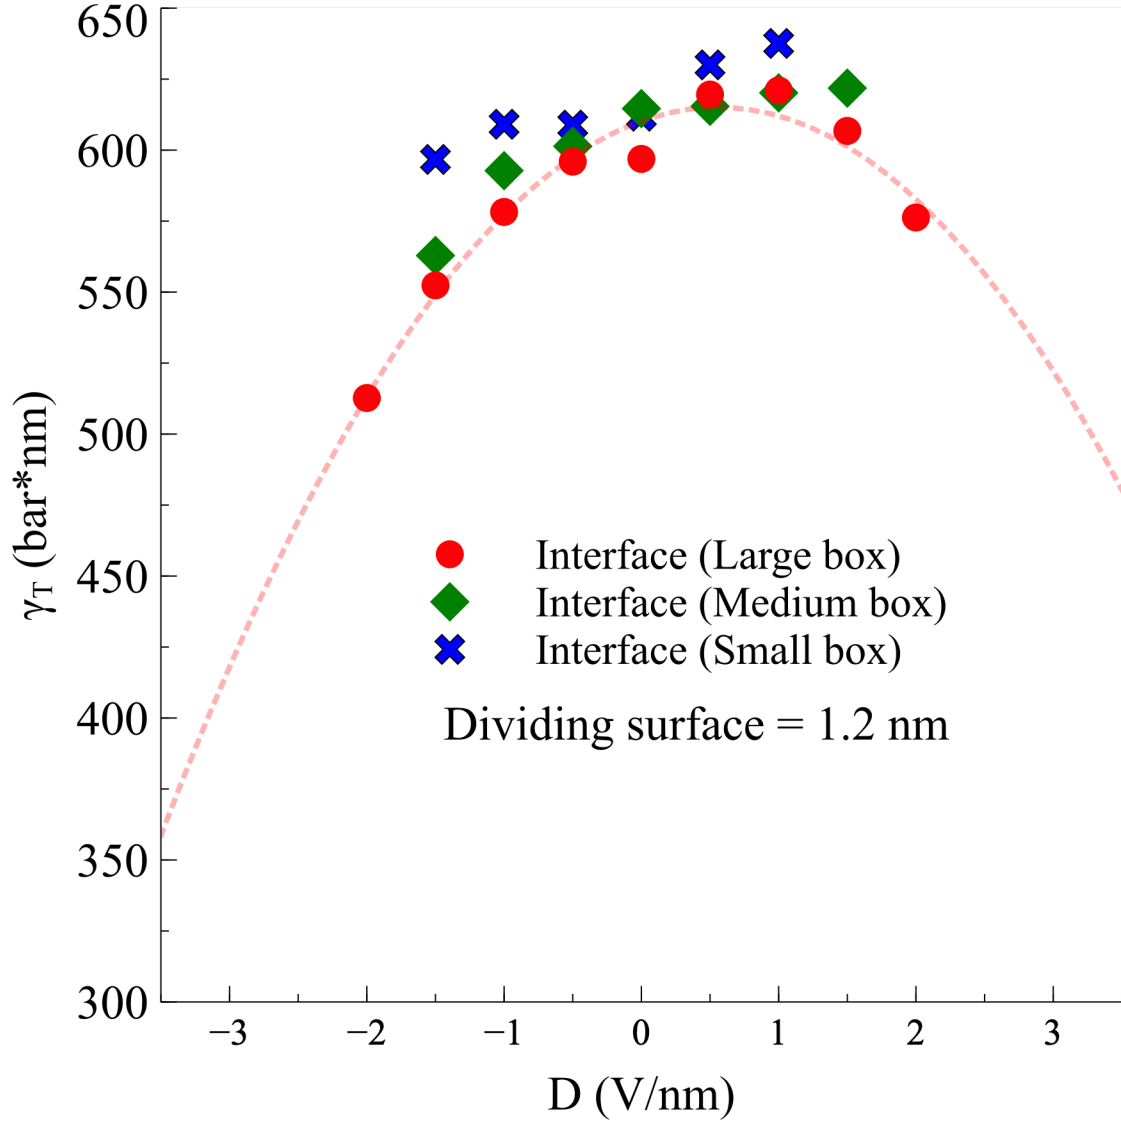

Figure S2: Field-dependent tangential component  $\gamma_T$  of the surface tension of the liquid water vapour interface.  $L_z=5.55$  nm, 8.33 nm and 11.11 nm are the values for the length in the direction normal to the surface for a small, medium and large MD box respectively. A dividing surface is chosen as 1.2 nm.
